# Supplementary material for: Are recent changes in sediment manganese sequestration in the euxinic basins of the Baltic Sea linked to the expansion of hypoxia?
Source: Copernicus journal article supplement (doi:10.5194/bg-12-4875-2015), 2015-08-19
Supplement: Supplementary file 1 [file bg-12-4875-2015-supplement.zip]

## Supplement 2: Data tables for sediments and pore waters

### Porewater data

Here, we compiled all the data that is displayed in Figure 2 and was used for the calculation of the diffusive fluxes of Mn across the sediment-water interface for sites LF1, BY5, LL19, BY15, F80 and LD1. For some sites a different set of samples with a higher resolution have been used to calculate the diffusive flux. The sampling procedure and the treatment of the samples is equal to the description in the main article.

In the third table of each site, where applicable, the results for  $\text{CaMnCO}_3$ , MnS and FeS of the Phreeq-C saturation calculations are shown.

#### Fladen BS1

| Depth<br>cm | Mn <sup>2+</sup><br>μM | Ca <sup>2+</sup><br>mM | Fe <sup>2+</sup><br>μM | Alk<br>mEq | NH <sub>4</sub> <sup>+</sup><br>μM | SO <sub>4</sub> <sup>2-</sup><br>mM |
|-------------|------------------------|------------------------|------------------------|------------|------------------------------------|-------------------------------------|
| BW          | 2.5                    | 6.7                    | 0.7                    | 1.97       |                                    |                                     |
| 0.75        | 22.93                  | 9.2                    | 1.4                    | 3.43       | 27.00                              | 28.78                               |
| 1.25        |                        | 9.5                    | 1.1                    | 2.14       | 18.32                              | 28.72                               |
| 1.75        | 115.77                 | 9.5                    | 0.7                    | 1.94       | 27.96                              | 28.61                               |
| 2.5         | 145.80                 | 9.6                    | 0.7                    | 2.67       | 34.71                              | 28.52                               |
| 3.5         | 144.53                 | 9.5                    | 18.3                   | 2.12       | 40.50                              | 28.75                               |
| 4.5         | 111.03                 | 9.3                    | 47.8                   | 1.98       | 45.32                              | 28.60                               |
| 5.5         | 64.44                  | 9.3                    | 68.9                   | 2.42       | 56.89                              | 28.45                               |
| 6.5         | 50.78                  | 9.4                    | 88.3                   | 2.25       | 131.14                             | 28.62                               |
| 7.5         | 48.42                  | 9.4                    | 111.4                  | 2.20       | 166.82                             | 28.34                               |
| 8.5         | 47.51                  | 9.5                    | 103.9                  | 2.36       | 103.18                             | 28.29                               |
| 9.5         | 47.87                  | 9.4                    | 98.7                   | 2.64       | 120.54                             | 28.15                               |
| 11.0        | 41.68                  | 9.1                    | 84.7                   | 2.49       | 125.36                             | 28.04                               |
| 13.0        | 35.13                  | 9.0                    | 66.6                   | 2.92       | 162.96                             | 27.97                               |
| 15.0        | 30.22                  | 9.2                    | 46.7                   | 3.72       | 178.39                             | 27.67                               |
| 17.0        | 28.03                  | 9.4                    | 50.1                   | 2.75       | 187.07                             | 27.72                               |
| 19.0        | 25.12                  | 9.1                    | 28.1                   | 2.94       | 195.75                             | 27.78                               |
| 22.0        | 23.48                  | 9.0                    | 44.8                   | 3.14       | 203.46                             | 27.77                               |
| 26.0        | 20.93                  | 9.0                    | 29.4                   | 3.98       | 268.07                             | 27.33                               |
| 30.0        | 19.29                  | 9.2                    | 6.8                    |            | 311.46                             | 27.21                               |

#### LF1

| Depth<br>cm | Mn <sup>2+</sup><br>μM | Ca <sup>2+</sup><br>mM | Fe <sup>2+</sup><br>μM | Alk<br>mEq | NH <sub>4</sub> <sup>+</sup><br>μM | SO <sub>4</sub> <sup>2-</sup><br>mM | Mn flux<br>μmol m <sup>-2</sup> d <sup>-1</sup> |
|-------------|------------------------|------------------------|------------------------|------------|------------------------------------|-------------------------------------|-------------------------------------------------|
| BW          | 0.73                   | 2.87                   | 0.00                   |            | 49.73                              | 6.28                                |                                                 |
| 0.25        | 13.45                  | 3.15                   | 256.79                 |            | 52.51                              | 5.53                                | -115                                            |
| 0.75        | 15.64                  | 3.14                   | 208.57                 | 2.24       | 75.72                              | 6.28                                |                                                 |
| 1.25        | 15.64                  | 3.21                   | 142.50                 | 2.11       | 90.56                              | 6.35                                |                                                 |
| 1.75        | 15.64                  | 3.30                   | 140.00                 | 2.21       | 107.69                             | 6.36                                |                                                 |
| 2.5         | 15.64                  | 3.49                   | 53.21                  | 2.71       | 118.66                             | 5.95                                |                                                 |
| 3.5         | 13.82                  | 3.62                   | 43.57                  | 3.05       | 144.07                             | 6.01                                |                                                 |
| 4.5         | 13.45                  | 3.80                   | 20.00                  | 3.59       | 165.24                             | 5.65                                |                                                 |
| 5.5         | 13.82                  | 3.85                   | 4.29                   | 3.89       | 166.80                             | 4.87                                |                                                 |
| 6.5         | 14.18                  | 3.89                   | 0.00                   | 4.13       | 185.80                             | 4.90                                |                                                 |
| 7.5         | 13.45                  | 3.78                   | 0.00                   | 4.39       | 187.34                             | 4.52                                |                                                 |
| 8.5         |                        |                        |                        | 4.67       | 229.20                             | 4.21                                |                                                 |
| 9.5         | 12.73                  | 3.72                   | 0.00                   | 4.75       | 235.62                             | 4.77                                |                                                 |
| 11          | 12.36                  | 3.65                   | 0.00                   | 4.81       | 251.91                             | 4.83                                |                                                 |
| 13          | 12.36                  | 3.67                   | 0.00                   | 5.07       | 234.76                             | 4.41                                |                                                 |
| 15          | 12.00                  | 3.59                   | 0.00                   | 4.92       | 244.14                             | 4.02                                |                                                 |
| 17          | 12.73                  | 3.56                   | 0.00                   | 5.02       | 250.38                             | 3.89                                |                                                 |
| 19          | 12.00                  | 3.46                   | 0.00                   | 4.78       | 245.62                             | 3.83                                |                                                 |
| 21          | 13.45                  | 3.66                   | 0.00                   | 5.01       | 195.34                             | 3.33                                |                                                 |
| 23          | 13.82                  | 3.63                   | 0.00                   | 5.00       | 259.87                             | 4.09                                |                                                 |
| 25          | 14.18                  | 3.51                   | 0.00                   | 4.98       | 238.63                             | 3.93                                |                                                 |

**BY5**

| Depth<br>cm | Mn <sup>2+</sup><br>μM | Ca <sup>2+</sup><br>mM | Fe <sup>2+</sup><br>μM | Alk<br>mEq | NH <sub>4</sub> <sup>+</sup><br>μM | SO <sub>4</sub> <sup>2-</sup><br>mM | Mn flux<br>μmol m <sup>-2</sup> d <sup>-1</sup> |
|-------------|------------------------|------------------------|------------------------|------------|------------------------------------|-------------------------------------|-------------------------------------------------|
| BW          | 22.39                  | 4.5935                 | 0.0                    | 1.49       | 5.79                               | 13.24                               | -235.86                                         |
| 0.5         | 58.79                  | 4.5883                 | 0.0                    |            |                                    |                                     |                                                 |
| 1.5         | 73.54                  | 4.6731                 | 0.0                    | 1.95       | 88.71                              | 12.62                               |                                                 |
| 2.25        | 93.38                  | 4.6689                 | 0.0                    | 3.07       | 110.89                             | 12.43                               |                                                 |
| 2.75        |                        |                        |                        | 3.22       | 104.14                             | 12.43                               |                                                 |
| 3.25        | 108.30                 | 4.6337                 | 0.0                    | 3.40       | 118.61                             | 12.32                               |                                                 |
| 3.75        | 117.95                 | 4.6058                 | 0.0                    | 2.95       | 132.11                             | 12.20                               |                                                 |
| 4.5         | 123.05                 | 4.603                  | 0.0                    | 3.74       | 134.04                             | 12.20                               |                                                 |
| 5.5         | 137.97                 | 4.7091                 | 0.0                    | 3.99       | 147.54                             | 12.08                               |                                                 |
| 6.5         | 149.08                 | 4.761                  | 0.0                    | 4.14       | 158.14                             | 12.00                               |                                                 |
| 7.5         | 158.91                 | 4.731                  | 0.0                    | 4.26       | 169.71                             | 11.87                               |                                                 |
| 8.5         | 168.19                 | 4.8041                 | 0.0                    | 4.34       | 182.25                             | 11.82                               |                                                 |
| 9.5         | 174.01                 | 4.7769                 | 0.0                    | 4.42       | 187.07                             | 11.76                               |                                                 |
| 11          | 178.20                 | 4.7927                 | 0.0                    | 4.71       | 197.68                             | 11.72                               |                                                 |
| 13          | 189.85                 | 4.7914                 | 0.0                    | 4.83       | 212.14                             | 11.61                               |                                                 |
| 15          | 195.86                 | 4.7922                 | 0.0                    | 4.95       | 221.79                             | 11.49                               |                                                 |
| 17          | 206.05                 | 4.869                  | 0.0                    | 5.08       | 231.43                             | 11.40                               |                                                 |
| 19          | 208.42                 | 4.7951                 | 0.0                    | 4.99       | 240.11                             | 11.36                               |                                                 |
| 22          | 215.52                 | 4.9189                 | 0.0                    | 5.15       | 250.71                             | 11.25                               |                                                 |
| 26          | 221.16                 | 4.9703                 | 0.0                    | 5.26       | 256.50                             | 11.20                               |                                                 |

**LF3 2011**

| Depth<br>cm | pH   | NH <sub>4</sub> <sup>+</sup><br>μM | SO <sub>4</sub> <sup>2-</sup><br>mM | HS <sup>-</sup><br>μM | Ca<br>mM | Cl<br>mM | Fe<br>μM | Mn <sup>2+</sup><br>μM | Na<br>mM | P<br>μM | Alk<br>mEq |
|-------------|------|------------------------------------|-------------------------------------|-----------------------|----------|----------|----------|------------------------|----------|---------|------------|
| BW          | 7.21 | 22.1                               |                                     | 7.58                  |          |          |          |                        |          |         | 2.84       |
| 1           | 7.25 | 62.3                               | 7.78                                | 21.14                 | 3.46     |          |          | 11.64                  | 142.89   | 42.62   | 3.12       |
| 6           | 7.67 | 186.9                              | 6.75                                | 154.99                | 3.64     |          |          | 5.82                   | 142.54   | 38.10   | 4.64       |
| 11          | 8.18 | 287.4                              | 6.09                                | 360.87                | 3.59     |          |          | 3.64                   | 142.16   | 54.24   | 6.17       |
| 16          | 8.14 | 351.8                              | 5.21                                | 563.32                | 3.50     |          |          | 3.27                   | 139.07   | 76.19   | 8.36       |
| 21          | 8.29 | 426.1                              | 4.52                                | 753.16                | 3.59     |          |          | 3.64                   | 143.01   | 91.69   | 8.70       |
| 26          | 8.23 | 516.6                              | 3.89                                | 930.87                | 3.55     |          |          | 4.36                   | 139.28   | 100.73  | 9.81       |
| 31          | 8.30 | 536.7                              | 3.40                                | 1093.85               | 3.50     |          |          | 4.36                   | 138.34   | 109.12  | 9.54       |
| 36          | 8.35 | 568.8                              | 3.02                                |                       | 3.54     |          |          | 5.09                   | 139.88   | 111.06  | 10.48      |
| 41          | 8.32 | 663.3                              | 2.61                                | 1325.95               | 3.56     |          |          | 4.73                   | 140.55   | 122.04  | 10.12      |
| 46          | 8.32 | 663.3                              | 2.38                                | 1420.58               | 3.64     |          |          | 4.36                   | 143.21   | 128.49  | 11.85      |

**LF3 2009 Aranda**

| Depth<br>cm | Mn <sup>2+</sup><br>μM | Mn flux<br>μmol m <sup>-2</sup> d <sup>-1</sup> |
|-------------|------------------------|-------------------------------------------------|
| BW          | 1.09                   |                                                 |
| 1           | 0.91                   | 0                                               |

**LF3**

| Depth<br>[cm] | SI<br>Mn <sub>0.74</sub> Ca <sub>0.26</sub> CO <sub>3</sub> | SI<br>MnS | SI<br>FeS |
|---------------|-------------------------------------------------------------|-----------|-----------|
| 1             | -3.4                                                        | -3.0      |           |
| 6             | -2.9                                                        | -2.2      |           |
| 11            | -2.2                                                        | -1.8      |           |
| 16            | -2.3                                                        | -1.8      |           |
| 21            | -2.0                                                        | -1.6      |           |
| 26            | -2.1                                                        | -1.6      |           |
| 31            | -1.9                                                        | -1.5      |           |
| 36            | -1.8                                                        | -1.4      |           |
| 41            | -1.8                                                        | -1.4      |           |
| 46            | -1.7                                                        | -1.4      |           |

**LL19 2011**

| Depth<br>cm | pH   | NH <sub>4</sub> <sup>+</sup><br>μM | SO <sub>4</sub> <sup>2-</sup><br>mM | HS <sup>-</sup><br>μM | CH <sub>4</sub><br>mM | Ca<br>mM | Cl<br>mM | Fe<br>μM | Mn <sup>2+</sup><br>μM | Na<br>mM | P<br>μM | Alk<br>mEq |
|-------------|------|------------------------------------|-------------------------------------|-----------------------|-----------------------|----------|----------|----------|------------------------|----------|---------|------------|
| BW          | 6.94 | 5.2                                | 8.75                                | 2.35                  | 0.0007                | 3.53     | 269.40   | 6.98     | 3.45                   | 141.02   | 0.00    | 2.1        |

|      |      |       |      |       |        |      |        |      |        |        |        |     |
|------|------|-------|------|-------|--------|------|--------|------|--------|--------|--------|-----|
| 2.5  | 7.35 | 93.6  | 8.15 | 2.44  | 0.0007 | 3.54 | 272.28 | 6.98 | 40.00  | 138.69 | 23.57  | 3.0 |
| 7.5  | 7.93 | 163.5 | 7.59 | 2.12  | 0.0009 | 3.62 | 286.42 | 7.16 | 79.27  | 143.78 | 51.33  | 4.1 |
| 12.5 | 8.05 | 228.8 | 7.09 | 2.45  | 0.0008 | 3.64 | 276.71 | 6.98 | 114.55 | 146.14 | 83.94  | 5.9 |
| 17.5 | 8.1  | 279.5 | 6.25 | 11.86 | 0.0009 | 3.56 | 270.56 | 6.98 | 135.45 | 140.28 | 101.05 | 6.2 |
| 22.5 | 8.08 | 321.3 | 6.49 | 2.37  | 0.0016 | 3.89 | 294.19 | 8.06 | 154.55 | 154.69 | 123.97 | 7.0 |
| 27.5 | 8.19 | 349.0 | 5.79 | 21.32 | 0.0011 | 3.75 | 287.63 | 7.52 | 157.09 | 151.63 | 140.44 | 7.3 |
| 32.5 | 8.22 | 325.2 | 5.50 | 9.98  | 0.0011 | 3.68 | 270.14 | 7.70 | 147.27 | 146.77 | 139.79 | 7.4 |
| 37.5 | 8.22 | 398.9 | 5.18 | 2.29  | 0.0013 | 3.72 | 401.37 | 7.16 | 141.27 | 143.20 | 144.31 | 8.0 |

### LL19 2009 Aranda

| Depth<br>cm | Mn <sup>2+</sup><br>μM | Mn flux<br>μmol m <sup>-2</sup> d <sup>-1</sup> |
|-------------|------------------------|-------------------------------------------------|
| BW          | 6.00                   |                                                 |
| 0.25        | 12.18                  | -80                                             |

### LL19

| Depth<br>[cm] | SI<br>Mn <sub>0.74</sub> Ca <sub>0.26</sub> CO <sub>3</sub> | SI<br>MnS | SI<br>FeS |
|---------------|-------------------------------------------------------------|-----------|-----------|
| 0             | -4.8172                                                     | -4.8965   | -1.2394   |
| 2             | -2.6607                                                     | -3.3248   | -0.762    |
| 7             | -1.0278                                                     | -2.5188   | -0.275    |
| 12            | -0.3291                                                     | -2.2574   | -0.2367   |
| 17            | -0.1567                                                     | -1.5025   | 0.4538    |
| 22            | -0.0326                                                     | -2.1739   | -0.2372   |
| 27            | 0.1553                                                      | -1.1464   | 0.7752    |
| 32            | 0.2275                                                      | -1.4475   | 0.4883    |
| 37            | 0.1339                                                      | -2.134    | -0.2049   |

### BY15 2010

| Depth<br>cm | pH   | NH <sub>4</sub> <sup>+</sup><br>μM | SO <sub>4</sub> <sup>2-</sup><br>mM | HS <sup>-</sup><br>μM | CH <sub>4</sub><br>mM | Ca<br>mM | Cl<br>mM | Fe<br>μM | Mn <sup>2+</sup><br>μM | Na<br>mM | P<br>μM | Alk<br>mEq |
|-------------|------|------------------------------------|-------------------------------------|-----------------------|-----------------------|----------|----------|----------|------------------------|----------|---------|------------|
| BW          | 6.89 | 48.31                              | 9.97                                | 11.90                 | 0.001                 | 4.02     | 281.45   | 6.45     | 11.27                  | 166.98   | 14.85   | 2.37       |
| 2.5         | 7.71 | 161.93                             | 8.65                                | 37.34                 | 0.001                 | 3.96     | 278.66   | 6.45     | 60.18                  | 165.82   | 36.48   | 4.17       |
| 7.5         | 7.93 | 215.70                             | 8.13                                | 76.14                 | 0.001                 | 3.98     | 297.83   | 5.73     | 114.00                 | 165.89   | 54.88   | 5.31       |
| 12.5        | 8.00 | 266.01                             | 7.77                                | 67.25                 | 0.001                 | 3.96     | 276.58   | 5.55     | 156.91                 | 169.28   | 68.44   | 6.12       |
| 17.5        | 8.10 | 297.12                             | 7.50                                | 67.42                 | 0.001                 | 4.09     | 269.16   | 5.55     | 182.73                 | 169.18   | 85.56   | 6.47       |
| 22.5        | 8.01 | 317.48                             | 7.11                                | 106.59                | 0.001                 | 4.10     | 286.04   | 5.01     | 194.91                 | 168.97   | 95.56   | 7.12       |
| 27.5        | 8.05 | 325.93                             | 6.74                                |                       | 0.001                 | 4.14     | 271.08   | 5.55     | 204.55                 | 172.12   | 104.93  | 7.57       |
| 32.5        | 8.07 | 371.63                             | 6.48                                | 131.08                | 0.001                 | 4.16     | 328.91   | 6.63     | 208.36                 | 171.55   | 114.94  | 7.99       |
| 37.5        | 8.15 | 388.53                             | 6.18                                | 173.94                | 0.001                 | 4.13     | 312.07   | 4.83     | 207.82                 | 168.12   | 119.13  | 8.36       |

### BY15 2009 Aranda

| Depth<br>cm | Mn <sup>2+</sup><br>μM | Mn flux<br>μmol m <sup>-2</sup> d <sup>-1</sup> |
|-------------|------------------------|-------------------------------------------------|
| BW          | 15.45                  |                                                 |
| 0.25        | 22.91                  | -98                                             |

### BY15

| Depth<br>[cm] | SI<br>Mn <sub>0.74</sub> Ca <sub>0.26</sub> CO <sub>3</sub> | SI<br>MnS | SI<br>FeS |
|---------------|-------------------------------------------------------------|-----------|-----------|
| 0             | -4.2969                                                     | -3.8046   | -0.6938   |
| 2             | -1.5689                                                     | -1.641    | 0.7484    |
| 7             | -0.7727                                                     | -0.9586   | 1.1307    |
| 12            | -0.3272                                                     | -0.8487   | 1.0296    |
| 17            | -0.0164                                                     | -0.7124   | 1.0832    |
| 22            | -0.1509                                                     | -0.6196   | 1.146     |
| 27            | 0.1885                                                      |           |           |
| 32            | -0.0036                                                     | -0.4791   | 1.3972    |
| 37            | 0.1256                                                      | -0.3041   | 1.484     |

### F80 2011

| Depth<br>cm | pH   | NH <sub>4</sub> <sup>+</sup><br>μM | SO <sub>4</sub> <sup>2-</sup><br>mM | HS <sup>-</sup><br>μM | CH <sub>4</sub><br>mM | Ca<br>mM | Cl<br>mM | Fe<br>μM | Mn <sup>2+</sup><br>μM | Na<br>mM | P<br>μM | Alk<br>mEq |
|-------------|------|------------------------------------|-------------------------------------|-----------------------|-----------------------|----------|----------|----------|------------------------|----------|---------|------------|
| BW          | 6.96 | 34.72                              | 9.72                                | 25.50                 | 0.005                 | 3.96     | 277.63   | 7.70     | 9.27                   | 162.93   | 12.27   | 2.44       |

|      |      |         |      |         |       |      |        |      |        |        |        |       |
|------|------|---------|------|---------|-------|------|--------|------|--------|--------|--------|-------|
| 2.5  | 7.92 | 341.87  | 6.25 | 1101.51 | 0.115 | 3.92 | 282.25 | 7.52 | 40.18  | 164.08 | 80.07  | 7.71  |
| 7.5  | 8.00 | 591.82  | 3.46 | 1877.74 | 0.743 | 3.84 | 281.40 | 7.88 | 86.18  | 163.62 | 146.57 | 12.13 |
| 12.5 | 8.04 | 771.47  | 2.11 | 2031.81 | 0.326 | 3.97 | 283.67 | 7.52 | 118.91 | 163.72 | 196.62 | 14.71 |
| 17.5 | 8.02 | 911.51  | 1.07 | 2031.59 | 1.149 | 4.01 | 286.43 | 6.98 | 155.64 | 167.69 | 241.49 | 16.55 |
| 22.5 | 7.93 | 1012.46 | 0.38 | 2184.51 | 1.406 | 3.92 | 292.56 | 6.63 | 185.27 | 166.99 | 285.72 | 18.24 |
| 27.5 | 7.95 | 1090.62 | 0.18 | 2035.96 | 3.194 | 3.69 | 285.37 | 6.98 | 200.55 | 162.10 | 304.77 | 18.95 |
| 32.5 | 8.03 | 1214.36 |      | 1933.46 | 3.544 | 3.66 | 277.23 | 6.27 | 219.45 | 164.89 | 328.66 | 19.19 |
| 37.5 | 8.26 | 1318.57 | 0.16 |         | 3.852 | 3.81 | 272.27 | 6.63 | 237.82 | 164.35 | 364.18 | 19.11 |
| 42.4 | 8.11 | 1351.14 |      | 1344.26 | 3.707 | 3.84 | 291.90 | 6.45 | 256.55 | 164.60 | 394.20 | 19.77 |

### F80 2009 Aranda

| Depth<br>cm | Mn <sup>2+</sup><br>μM | Mn flux<br>μmol m <sup>-2</sup> d <sup>-1</sup> |
|-------------|------------------------|-------------------------------------------------|
| BW          | 12.18                  |                                                 |
| 0.25        | 18.55                  | -84                                             |

### F80

| Depth<br>[cm] | SI<br>Mn <sub>0.74</sub> Ca <sub>0.26</sub> CO <sub>3</sub> | SI<br>MnS | SI<br>FeS |
|---------------|-------------------------------------------------------------|-----------|-----------|
| 0             | -4.2317                                                     | -3.4723   | -0.1838   |
| 2             | -1.9964                                                     | -0.909    | 2.5863    |
| 7             | -1.3864                                                     | -0.4807   | 2.8303    |
| 12            | -0.9947                                                     | -0.3004   | 2.8209    |
| 17            | -0.7743                                                     | -0.205    | 2.7204    |
| 22            | -0.8142                                                     | -0.218    | 2.6075    |
| 27            | -0.6699                                                     | -0.1663   | 2.594     |
| 32            | -0.4397                                                     | -0.0497   | 2.5892    |
| 37            | 0.3352                                                      | 0.1891    | 2.5743    |
| 42            | 0.0255                                                      | 0.0768    | 2.4554    |

### LD1 2011

| Depth<br>cm | pH   | NH <sub>4</sub> <sup>+</sup><br>μM | SO <sub>4</sub> <sup>2-</sup><br>mM | HS <sup>-</sup><br>μM | CH <sub>4</sub><br>mM | Ca<br>mM | Cl<br>mM | Fe<br>μM | Mn <sup>2+</sup><br>μM | Na<br>mM | P<br>μM | Alk<br>mEq |
|-------------|------|------------------------------------|-------------------------------------|-----------------------|-----------------------|----------|----------|----------|------------------------|----------|---------|------------|
| BW          | 6.99 | 37.35                              |                                     | 58.05                 | 0.001                 |          |          |          |                        |          |         | 2.24       |
| 2.5         | 7.94 | 968.41                             | 1.02                                | 2252.65               |                       | 3.52     | 273.19   |          | 205.45                 | 139.10   | 198.23  | 15.88      |
| 7.5         | 8.08 | 1151.79                            | 0.33                                | 1527.95               | 0.971                 | 3.42     | 271.68   |          | 303.09                 | 138.25   | 245.69  | 18.79      |
| 12.5        | 8.19 | 1359.85                            | 0.20                                | 1442.33               | 1.302                 | 3.47     | 277.29   |          | 378.00                 | 140.30   | 323.17  | 18.96      |
| 17.5        | 8.17 | 1539.70                            | 0.19                                | 1569.75               | 1.851                 | 3.58     | 274.58   |          | 830.00                 | 141.90   | 504.29  | 19.49      |
| 22.5        | 8.07 | 1631.39                            | 0.19                                | 1114.11               | 2.447                 | 3.51     | 273.47   |          |                        | 137.96   | 404.86  | 20.16      |
| 27.5        | 8.09 | 1673.71                            | 0.28                                | 889.60                | 3.129                 | 3.57     | 288.03   |          | 1078.00                | 139.18   | 565.96  | 20.49      |
| 32.5        | 8.07 | 1800.66                            | 0.35                                | 560.07                | 45.801                | 3.58     | 281.86   |          | 1221.27                | 141.41   | 598.57  | 21.17      |
| 37.5        | 8.08 | 1959.35                            | 0.29                                | 664.11                | 55.987                | 3.46     | 279.75   |          | 1194.91                | 139.09   | 620.20  | 21.10      |

### LD1 2011

| Depth<br>cm | Mn <sup>2+</sup><br>μM | Mn flux<br>μmol m <sup>-2</sup> d <sup>-1</sup> |
|-------------|------------------------|-------------------------------------------------|
| BW          |                        |                                                 |
| 2.5         | 205.45                 | ~220 *                                          |

\* LD1 has no measured bottom water sample. Therefore, the diffusive flux was estimated using the bottom water value of 3.1 from the Landsort Deep site BY31 from Mort et al. 2010.

### LD1

| Depth<br>[cm] | SI<br>Mn <sub>0.74</sub> Ca <sub>0.26</sub> CO <sub>3</sub> | SI<br>MnS | SI<br>FeS |
|---------------|-------------------------------------------------------------|-----------|-----------|
| 2             | -0.985                                                      | -0.1607   |           |
| 7             | -0.1095                                                     | 0.1273    |           |
| 12            | 0.2242                                                      | 0.3243    |           |
| 17            | 0.6117                                                      | 0.6309    |           |
| 22            | 0.4445                                                      | 0.3291    |           |
| 27            | 1.0928                                                      | 0.5108    |           |
| 32            | 1.3571                                                      | 0.3398    |           |
| 37            | 1.2882                                                      | 0.4138    |           |

## Sediment data

### Fladen BS1 2007

| Depth<br>cm | Age  | Porosity<br>vol% | Al<br>Wt% | TOC<br>Wt% | S<br>Wt% | Mn<br>Wt% | Ca<br>Wt% | Fe<br>Wt% | Fe/Al<br>wt%/wt% | Mo<br>μmol/g |
|-------------|------|------------------|-----------|------------|----------|-----------|-----------|-----------|------------------|--------------|
| 0.25        | 2007 | 92.92            | 5.91      | 2.82       | 0.47     | 0.166     | 3.81      | 3.66      | 0.299            | 0.019        |
| 0.75        | 2006 | 92.35            | 6.14      | 2.73       | 0.44     | 0.124     | 3.90      | 3.79      | 0.298            | 0.011        |
| 1.25        | 2006 | 91.96            | 6.10      | 2.98       | 0.40     | 0.112     | 3.89      | 3.80      | 0.301            | 0.014        |
| 1.75        | 2005 | 89.90            | 6.28      | 2.67       | 0.37     | 0.084     | 4.33      | 3.82      | 0.294            | 0.098        |
| 2.5         | 2005 | 89.82            | 6.21      | 2.67       | 0.35     | 0.074     | 3.95      | 3.81      | 0.296            | 0.02         |
| 3.5         | 2004 | 88.97            | 6.22      | 2.68       | 0.35     | 0.075     | 3.91      | 3.87      | 0.301            | 0.009        |
| 4.5         | 2003 | 88.39            | 6.16      | 2.52       | 0.34     | 0.064     | 3.91      | 3.85      | 0.302            | 0.011        |
| 5.5         | 2002 | 88.07            | 6.35      | 2.68       | 0.34     | 0.048     | 3.96      | 3.82      | 0.291            | 0.004        |
| 6.5         | 2001 | 87.94            | 6.27      | 2.60       | 0.32     | 0.042     | 3.97      | 3.75      | 0.289            | 0.011        |
| 7.5         | 2000 | 87.01            | 6.34      | 2.58       | 0.33     | 0.042     | 3.96      | 3.72      | 0.283            | 0.009        |
| 8.5         | 1999 | 86.23            | 6.31      | 2.43       | 0.32     | 0.041     | 4.00      | 3.73      | 0.285            | 0.011        |
| 9.5         | 1998 | 86.50            | 6.36      | 2.54       | 0.32     | 0.041     | 4.17      | 3.71      | 0.282            | 0.007        |
| 11          | 1996 | 85.76            | 6.22      | 2.57       | 0.34     | 0.042     | 4.27      | 3.71      | 0.288            | 0.011        |
| 13          | 1994 | 84.51            | 6.50      | 2.37       | 0.34     | 0.040     | 3.95      | 3.83      | 0.285            | 0.013        |
| 15          | 1992 | 86.14            | 6.63      | 2.49       | 0.35     | 0.040     | 3.82      | 3.86      | 0.281            | 0.014        |
| 17          | 1990 | 85.19            | 6.54      | 2.48       | 0.37     | 0.040     | 3.67      | 3.89      | 0.287            | 0.016        |
| 19          | 1988 | 85.22            | 6.52      | 2.61       | 0.35     | 0.039     | 3.68      | 3.85      | 0.285            | 0.016        |
| 22          | 1985 | 84.61            | 6.46      | 2.37       | 0.35     | 0.039     | 3.73      | 3.73      | 0.279            | 0.018        |
| 26          | 1981 | 83.35            | 6.52      | 2.14       | 0.45     | 0.039     | 3.72      | 3.83      | 0.283            | 0.023        |
| 30          | 1977 | 82.99            | 6.17      | 2.11       | 0.42     | 0.036     | 3.51      | 3.56      | 0.279            | 0.026        |

### LF1

| Depth<br>cm | Age    | Porosity<br>vol% | Al<br>Wt% | TOC<br>Wt% | S<br>Wt% | Mn<br>Wt% | Ca<br>Wt% | Fe<br>Wt% | Fe/Al<br>wt%/wt% | Mo<br>μmol/g |
|-------------|--------|------------------|-----------|------------|----------|-----------|-----------|-----------|------------------|--------------|
| 0.25        | 2009.5 | 86.67            | 4.55      | 2.79       | 0.16     | 0.03      | 2.22      | 2.19      | 0.48             | 0.00         |
| 0.75        | 2008.2 | 85.49            | 4.91      | 2.45       | 0.14     | 0.03      | 1.89      | 2.19      | 0.45             | 0.01         |
| 1.25        | 2006.5 | 84.09            | 4.60      | 2.22       | 0.16     | 0.03      | 1.64      | 2.03      | 0.44             | 0.01         |
| 1.75        | 2004.8 | 83.22            | 4.92      | 2.26       | 0.16     | 0.03      | 1.77      | 2.16      | 0.44             | 0.01         |
| 2.5         | 2002.8 | 82.73            | 4.60      | 1.93       | 0.16     | 0.02      | 1.54      | 2.00      | 0.43             | 0.01         |
| 3.5         | 1998.9 | 73.25            | 4.34      | 1.42       | 0.28     | 0.02      | 1.23      | 1.78      | 0.41             | 0.01         |
| 4.5         | 1994.4 | 68.04            | 4.18      | 1.06       | 0.47     | 0.02      | 1.23      | 1.83      | 0.44             | 0.02         |
| 5.5         | 1989.6 | 72.03            | 4.57      | 1.47       | 0.62     | 0.02      | 1.40      | 2.16      | 0.47             | 0.01         |
| 6.5         | 1984.8 | 73.90            | 4.64      | 1.47       | 0.50     | 0.02      | 1.41      | 2.07      | 0.45             | 0.01         |
| 7.5         | 1979.9 | 79.90            | 5.26      | 2.41       | 0.55     | 0.03      | 1.27      | 2.51      | 0.48             | 0.01         |
| 8.5         | 1964.1 | 81.94            | 5.26      | 2.71       | 0.74     | 0.03      | 1.20      | 2.74      | 0.52             | 0.02         |
| 9.5         | 1954.1 | 77.28            | 4.65      | 1.55       | 0.56     | 0.02      | 1.09      | 2.18      | 0.47             | 0.01         |
| 11          | 1943.5 | 77.02            | 4.62      | 1.41       | 0.70     | 0.02      | 0.70      | 2.32      | 0.50             | 0.01         |
| 13          | 1903.9 | 67.04            | 3.96      | 1.13       | 0.57     | 0.02      | 0.65      | 1.76      | 0.44             | 0.01         |
| 15          | 1847.7 | 65.16            | 4.24      | 0.99       | 0.65     | 0.02      | 0.54      | 1.98      | 0.47             | 0.02         |
| 17          | 1843.3 | 66.81            | 4.42      | 1.16       | 1.50     | 0.02      | 0.55      | 2.85      | 0.65             | 0.07         |
| 19          |        | 63.77            | 3.97      | 0.88       | 2.30     | 0.02      | 0.52      | 3.32      | 0.84             | 0.09         |
| 21          |        | 61.96            | 4.01      | 0.73       | 1.69     | 0.02      | 0.55      | 2.81      | 0.70             | 0.05         |
| 23          |        | 63.15            | 4.28      | 1.07       | 2.07     | 0.02      | 0.59      | 3.28      | 0.77             | 0.09         |
| 25          |        | 64.74            | 4.24      | 0.83       | 2.82     | 0.02      | 0.67      | 3.94      | 0.93             | 0.14         |

### BY5 2007

| Depth<br>cm | Age  | Porosity<br>vol% | Al<br>Wt% | TOC<br>Wt% | S<br>Wt% | Mn<br>Wt% | Ca<br>Wt% | Fe<br>Wt% | Fe/Al<br>wt%/wt% | Mo<br>μmol/g |
|-------------|------|------------------|-----------|------------|----------|-----------|-----------|-----------|------------------|--------------|
| 0.5         | 2006 | 99.03            | 3.35      | 11.91      | 2.03     | 0.060     | 0.71      | 3.37      | 1.01             | 0.376        |
| 2.25        | 2001 | 96.49            | 6.08      | 6.22       | 1.41     | 0.108     | 0.64      | 4.10      | 0.67             | 0.162        |
| 2.75        | 1998 | 91.26            | 6.86      | 6.71       | 1.45     | 0.079     | 0.59      | 4.63      | 0.67             | 0.282        |
| 3.25        | 1995 | 95.86            | 6.52      | 6.14       | 1.49     | 0.093     | 0.60      | 4.36      | 0.67             | 0.263        |
| 3.75        | 1991 | 87.24            | 7.02      | 5.73       | 1.49     | 0.072     | 0.54      | 4.66      | 0.66             | 0.239        |
| 4.5         | 1985 | 94.43            | 6.69      | 3.93       | 1.57     | 0.073     | 0.57      | 4.55      | 0.68             | 0.204        |
| 5.5         | 1979 | 89.72            | 7.00      | 5.64       | 1.76     | 0.081     | 0.69      | 4.98      | 0.71             | 0.224        |
| 6.5         | 1972 | 93.91            | 7.02      | 5.27       | 1.63     | 0.085     | 0.64      | 4.84      | 0.69             | 0.147        |
| 7.5         | 1965 | 92.77            | 7.03      | 5.18       | 1.54     | 0.106     | 0.66      | 4.73      | 0.67             | 0.104        |
| 8.5         | 1957 | 92.63            | 7.14      | 5.04       | 1.58     | 0.159     | 0.70      | 4.77      | 0.67             | 0.122        |
| 9.5         | 1947 | 91.96            | 7.23      | 4.73       | 1.17     | 0.122     | 0.66      | 4.46      | 0.62             | 0.12         |

|    |      |       |      |      |      |       |      |      |      |       |
|----|------|-------|------|------|------|-------|------|------|------|-------|
| 11 | 1924 | 91.61 | 7.26 | 4.59 | 0.77 | 0.087 | 0.67 | 4.10 | 0.56 | 0.093 |
| 13 | 1895 | 91.47 | 7.28 | 4.52 | 0.71 | 0.090 | 0.66 | 4.14 | 0.57 | 0.075 |
| 15 | 1886 | 91.95 | 7.28 | 4.44 | 0.92 | 0.323 | 0.72 | 4.34 | 0.60 | 0.085 |
| 17 |      | 90.32 | 6.95 | 4.56 | 1.91 | 1.041 | 0.87 | 5.08 | 0.73 | 0.163 |
| 19 |      | 89.92 | 7.01 | 4.72 | 2.38 | 0.198 | 0.66 | 5.53 | 0.79 | 0.179 |
| 22 |      | 90.06 | 7.13 | 5.10 | 2.23 | 0.107 | 0.66 | 5.40 | 0.76 | 0.21  |
| 26 |      | 90.29 | 6.95 | 5.05 | 2.69 | 0.518 | 0.78 | 5.63 | 0.81 | 0.214 |

### LF3

| Depth<br>cm | Age    | Porosity<br>vol% | Al<br>Wt% | TOC<br>Wt% | S<br>Wt% | Mn<br>Wt% | Ca<br>Wt% | Fe<br>Wt% | Fe/Al<br>wt%/wt% | Mo<br>μmol/g |
|-------------|--------|------------------|-----------|------------|----------|-----------|-----------|-----------|------------------|--------------|
| 0.25        | 2009.5 | 97.64            | 5.07      | 9.54       | 0.84     | 0.03      | 1.02      | 3.03      | 0.60             | 0.29         |
| 0.75        | 2008.8 | 97.51            | 5.58      | 8.52       | 0.91     | 0.03      | 0.96      | 3.40      | 0.61             | 0.35         |
| 1.25        | 2008.0 | 96.87            | 5.86      | 7.39       | 1.05     | 0.03      | 0.74      | 3.62      | 0.62             | 0.30         |
| 1.75        | 2007.2 | 95.37            | 6.37      | 5.60       | 0.99     | 0.03      | 0.69      | 3.78      | 0.59             | 0.17         |
| 2.5         | 2006.3 | 94.59            | 6.49      | 5.43       | 0.85     | 0.03      | 0.60      | 3.71      | 0.57             | 0.10         |
| 3.5         | 2004.3 | 94.88            | 6.32      | 5.48       | 0.95     | 0.03      | 0.53      | 3.71      | 0.59             | 0.08         |
| 4.5         | 2002.2 | 94.10            | 6.26      | 5.23       | 0.84     | 0.03      | 0.48      | 3.54      | 0.57             | 0.05         |
| 5.5         | 1999.9 | 93.77            | 6.22      | 5.17       | 0.99     | 0.03      | 0.45      | 3.65      | 0.59             | 0.07         |
| 6.5         | 1997.4 | 93.26            | 6.23      | 5.20       | 1.11     | 0.03      | 0.44      | 3.72      | 0.60             | 0.07         |
| 7.5         | 1994.4 | 93.19            | 6.12      | 5.23       | 1.32     | 0.03      | 0.44      | 3.83      | 0.63             | 0.11         |
| 8.5         | 1991.4 | 90.16            | 6.08      | 3.66       | 1.26     | 0.03      | 0.45      | 3.67      | 0.60             | 0.05         |
| 9.5         | 1988.9 | 91.36            | 6.05      | 3.91       | 1.19     | 0.03      | 0.46      | 3.65      | 0.60             | 0.06         |
| 11          | 1986.6 | 86.20            | 6.17      | 2.76       | 0.80     | 0.03      | 0.50      | 3.34      | 0.54             | 0.04         |
| 13          | 1983.1 | 87.19            | 6.31      | 3.22       | 0.82     | 0.03      | 0.58      | 3.46      | 0.55             | 0.04         |
| 15          | 1976.8 | 92.10            | 6.19      | 5.50       | 0.90     | 0.03      | 0.47      | 3.48      | 0.56             | 0.11         |
| 17          | 1961.3 | 91.07            | 6.18      | 4.57       | 1.10     | 0.03      | 0.44      | 3.69      | 0.60             | 0.10         |
| 19          | 1943.7 | 87.14            | 6.52      | 3.01       | 0.94     | 0.03      | 0.60      | 3.74      | 0.57             | 0.04         |
| 21          | 1923.1 | 83.99            | 5.95      | 2.50       | 0.77     | 0.03      | 0.83      | 3.20      | 0.54             | 0.02         |
| 23          | 1869.7 | 81.57            | 5.94      | 2.06       | 1.29     | 0.03      | 0.71      | 3.59      | 0.60             | 0.04         |
| 26          |        | 81.78            | 5.88      | 2.12       | 2.46     | 0.03      | 0.60      | 4.59      | 0.78             | 0.11         |
| 30          |        | 85.52            | 6.37      | 2.67       | 2.48     | 0.03      | 0.54      | 4.88      | 0.77             | 0.12         |
| 34          |        | 83.84            | 6.14      |            | 1.49     | 0.03      | 0.58      | 3.97      | 0.65             | 0.06         |

### LL19

| Depth<br>cm | Age    | Porosity<br>vol% | Al<br>Wt% | TOC<br>Wt% | S<br>Wt% | Mn<br>Wt% | Ca<br>Wt% | Fe<br>Wt% | Fe/Al<br>wt%/wt% | Mo<br>μmol/g |
|-------------|--------|------------------|-----------|------------|----------|-----------|-----------|-----------|------------------|--------------|
| 0.25        | 2009.5 | 98.93            | 5.32      | 11.83      | 0.99     | 0.04      | 0.80      | 3.52      | 0.32             | 1.62         |
| 0.75        | 2008.2 | 99.01            | 5.14      | 13.65      | 2.02     | 0.05      | 0.83      | 4.61      | 0.43             | 2.25         |
| 1.25        | 2007.1 | 98.90            | 5.23      | 12.87      | 2.19     | 0.06      | 0.84      | 4.75      | 0.44             | 2.15         |
| 1.75        | 2005.8 | 98.71            | 5.57      | 11.68      | 2.04     | 0.06      | 0.84      | 4.71      | 0.41             | 2.04         |
| 2.5         | 2004.5 | 98.30            | 6.08      | 9.82       | 1.81     | 0.06      | 0.81      | 4.66      | 0.37             | 1.66         |
| 3.5         | 2001.0 | 97.91            | 6.42      | 8.83       | 2.37     | 0.10      | 0.86      | 5.66      | 0.43             | 1.66         |
| 4.5         | 1997.3 | 97.74            | 6.34      | 8.44       | 2.17     | 0.75      | 1.00      | 5.56      | 0.42             | 1.74         |
| 5.5         | 1993.7 | 97.71            | 6.09      | 8.47       | 2.41     | 2.11      | 1.24      | 5.82      | 0.46             | 1.67         |
| 6.5         | 1990.1 | 97.38            | 6.25      | 7.59       | 2.81     | 1.26      | 1.15      | 6.10      | 0.47             | 1.89         |
| 7.5         | 1984.8 | 97.38            | 6.38      | 7.73       | 3.93     | 0.15      | 0.94      | 7.09      | 0.54             | 2.31         |
| 8.5         | 1978.9 | 97.41            | 5.87      | 7.18       | 6.86     | 0.29      | 0.79      | 9.97      | 0.82             | 1.28         |
| 9.5         | 1973.0 | 95.63            | 7.64      | 3.74       | 4.54     | 0.96      | 0.95      | 8.99      | 0.57             | 0.25         |
| 11          | 1968.7 | 92.39            | 8.72      | 2.87       | 1.48     | 0.17      | 0.82      | 6.43      | 0.36             | 0.12         |
| 13          | 1958.6 | 88.40            | 8.85      | 2.48       | 0.63     | 0.11      | 0.79      | 5.54      | 0.30             | 0.11         |
| 15          | 1944.6 | 86.65            | 9.10      | 2.21       | 0.61     | 0.10      | 0.79      | 5.68      | 0.30             | 0.12         |
| 17          | 1930.1 | 86.56            | 8.64      | 2.14       | 0.81     | 0.10      | 0.77      | 5.62      | 0.31             | 0.09         |
| 19          | 1911.8 | 87.11            | 8.34      | 2.17       | 0.93     | 0.10      | 0.73      | 5.49      | 0.32             | 0.08         |
| 21          | 1891.3 | 86.28            | 8.70      | 1.95       | 0.68     | 0.10      | 0.73      | 5.30      | 0.29             | 0.06         |
| 23          | 1862.7 | 86.09            | 8.93      | 1.97       | 0.56     | 0.11      | 0.77      | 5.44      | 0.29             | 0.06         |
| 25          |        | 86.51            | 8.93      | 1.92       | 0.62     | 0.11      | 0.75      | 5.48      | 0.30             | 0.05         |

### BY15

| Depth<br>cm | Age    | Porosity<br>vol% | Al<br>Wt% | TOC<br>Wt% | S<br>Wt% | Mn<br>Wt% | Ca<br>Wt% | Fe<br>Wt% | Fe/Al<br>wt%/wt% | Mo<br>μmol/g |
|-------------|--------|------------------|-----------|------------|----------|-----------|-----------|-----------|------------------|--------------|
| 0.25        | 2009.5 | 99.28            | 4.11      | 10.87      | 1.38     | 0.12      | 0.64      | 3.29      | 0.80             | 1.96         |
| 0.75        | 2008.3 | 99.12            | 4.67      | 11.57      | 1.90     | 0.19      | 0.72      | 4.19      | 0.90             | 2.07         |
| 1.25        | 2007.0 | 98.66            | 5.35      | 9.54       | 2.54     | 0.85      | 0.94      | 5.31      | 0.99             | 1.49         |
| 1.75        | 2005.6 | 98.27            | 5.53      |            | 3.29     | 0.78      | 0.80      | 6.23      | 1.13             | 1.59         |

|      |        |       |      |       |      |      |      |      |      |      |
|------|--------|-------|------|-------|------|------|------|------|------|------|
| 2.25 | 2003.8 | 98.16 | 5.75 | 9.89  | 1.92 | 0.12 | 0.58 | 4.42 | 0.77 | 2.13 |
| 2.75 | 2001.8 | 98.40 | 5.71 | 10.63 | 2.04 | 0.08 | 0.55 | 4.21 | 0.74 | 2.66 |
| 3.25 | 1999.6 | 97.87 | 5.70 | 10.11 | 2.02 | 0.08 | 0.53 | 4.20 | 0.74 | 2.53 |
| 3.75 | 1996.7 | 97.67 | 5.74 | 8.55  | 4.55 | 0.14 | 0.59 | 6.45 | 1.12 | 2.29 |
| 4.25 | 1994.1 | 98.21 | 4.86 | 9.39  | 5.24 | 0.30 | 0.74 | 6.94 | 1.43 | 2.81 |
| 5    | 1992.1 | 97.17 | 4.22 | 6.01  | 4.45 | 6.89 | 2.50 | 5.97 | 1.41 | 1.50 |
| 6    | 1987.9 | 96.65 | 4.48 | 4.50  | 5.25 | 6.13 | 2.07 | 7.14 | 1.59 | 2.03 |
| 7    | 1983.8 | 94.91 | 5.45 | 3.88  | 2.98 | 7.55 | 2.75 | 5.64 | 1.03 | 0.44 |
| 8    | 1979.9 | 93.32 | 6.28 | 3.31  | 1.92 | 5.87 | 2.30 | 4.86 | 0.77 | 0.26 |
| 9    | 1975.9 | 93.07 | 6.65 | 3.74  | 1.94 | 3.67 | 1.63 | 5.10 | 0.77 | 0.39 |
| 10.5 | 1971.6 | 91.55 | 6.14 | 3.33  | 1.32 | 6.33 | 2.31 | 4.22 | 0.69 | 0.42 |
| 12.5 | 1961.6 | 92.20 | 7.60 | 3.32  | 1.84 | 2.03 | 1.03 | 5.63 | 0.74 | 0.43 |
| 14.5 | 1954.8 | 90.72 | 7.74 | 3.35  | 0.78 | 2.59 | 1.15 | 4.55 | 0.59 | 0.20 |
| 16.5 | 1945.8 | 91.11 | 7.35 | 3.11  | 1.70 | 3.28 | 1.35 | 5.29 | 0.72 | 0.26 |
| 18.5 | 1938.0 | 90.88 | 7.53 | 3.23  | 1.46 | 1.57 | 0.86 | 5.34 | 0.71 | 0.33 |
| 20.5 | 1924.9 | 90.32 | 7.56 | 3.42  | 0.79 | 2.32 | 1.12 | 4.49 | 0.59 | 0.21 |
| 22.5 | 1912.2 | 90.02 | 7.47 | 3.47  | 1.57 | 1.80 | 0.93 | 5.10 | 0.68 | 0.33 |
| 24.5 | 1886.1 | 89.46 | 7.24 | 3.30  | 0.85 | 3.93 | 1.54 | 4.32 | 0.60 | 0.35 |
| 26.5 |        | 89.94 | 7.83 | 3.23  | 2.11 | 0.68 | 0.67 | 5.85 | 0.75 | 0.84 |
| 29.5 |        | 90.18 | 7.46 | 3.50  | 1.31 | 2.68 | 1.21 | 4.88 | 0.65 | 0.41 |
| 33   |        | 91.04 | 7.13 | 4.04  | 1.51 | 1.89 | 1.01 | 4.94 | 0.69 | 0.57 |
| 35   |        | 90.96 | 6.82 | 4.37  | 3.11 | 2.08 | 1.14 | 6.03 | 0.88 | 0.91 |
| 36   |        | 90.88 | 6.44 | 4.50  | 2.04 | 3.84 | 1.61 | 5.00 | 0.78 | 0.66 |
| 37   |        | 90.25 | 5.86 | 4.54  | 2.79 | 5.75 | 2.16 | 5.28 | 0.90 | 1.11 |
| 38   |        | 90.47 | 5.12 | 4.67  | 3.91 | 8.36 | 2.58 | 5.77 | 1.13 | 1.03 |
| 39   |        | 90.44 | 5.81 | 4.42  | 1.82 | 7.44 | 2.55 | 4.45 | 0.77 | 0.64 |

## F80

| Depth<br>cm | Age  | Porosity<br>vol% | Al<br>Wt% | TOC<br>Wt% | S<br>Wt% | Mn<br>Wt% | Ca<br>Wt% | Fe<br>Wt% | Fe/Al<br>wt%/wt% | Mo<br>μmol/g |
|-------------|------|------------------|-----------|------------|----------|-----------|-----------|-----------|------------------|--------------|
| 0.25        | 2009 | 99.27            | 4.38      | 14.03      |          |           |           |           |                  |              |
| 0.75        | 2009 | 99.30            | 4.30      | 15.72      | 1.08     | 0.04      | 0.62      | 3.35      | 0.76             | 2.22         |
| 1.25        | 2008 | 99.09            | 4.24      | 14.25      | 1.22     | 0.04      | 0.68      | 3.61      | 0.84             | 2.04         |
| 1.75        | 2008 | 98.99            | 3.98      | 15.01      | 1.16     | 0.04      | 0.67      | 3.48      | 0.82             | 2.00         |
| 2.5         | 2007 | 98.87            | 4.83      | 16.42      | 1.01     | 0.04      | 0.67      | 3.13      | 0.79             | 1.96         |
| 3.5         | 2006 | 98.56            | 5.23      | 13.54      | 1.57     | 0.05      | 0.72      | 4.30      | 0.89             | 2.09         |
| 4.5         | 2005 | 98.46            | 5.70      | 11.63      | 1.59     | 0.06      | 0.76      | 4.27      | 0.82             | 2.30         |
| 5.5         | 2005 | 97.50            | 5.64      | 9.09       | 1.25     | 0.06      | 0.79      | 3.85      | 0.68             | 1.83         |
| 6.5         | 2005 | 97.70            | 5.56      | 9.98       | 1.35     | 0.06      | 0.71      | 3.94      | 0.70             | 1.72         |
| 7.5         | 2004 | 97.73            | 5.46      | 10.71      | 1.78     | 0.07      | 0.75      | 4.50      | 0.81             | 1.71         |
| 8.5         | 2004 | 97.51            | 5.20      | 9.40       | 1.68     | 1.31      | 0.97      | 4.53      | 0.83             | 1.27         |
| 9.5         | 2001 | 97.28            | 5.25      | 9.19       | 1.56     | 1.30      | 0.95      | 4.02      | 0.77             | 1.84         |
| 11          | 1999 | 97.15            | 5.55      | 9.35       | 1.32     | 0.09      | 0.71      | 3.64      | 0.69             | 1.98         |
| 13          | 1996 | 97.13            | 5.08      | 9.14       | 1.70     | 0.08      | 0.75      | 4.21      | 0.76             | 2.22         |
| 15          | 1992 | 97.28            | 5.27      | 8.16       | 2.01     | 1.11      | 1.03      | 4.86      | 0.96             | 1.46         |
| 17          | 1988 | 97.28            | 5.05      | 8.25       | 2.69     | 0.34      | 0.88      | 5.60      | 1.06             | 1.61         |
| 19          | 1984 | 97.51            | 5.01      | 8.83       | 3.17     | 0.15      | 0.78      | 6.40      | 1.27             | 1.71         |
| 21          | 1981 | 97.27            | 5.09      | 7.91       | 3.81     | 0.15      | 0.76      | 7.04      | 1.40             | 1.41         |
| 23          | 1977 | 96.91            | 5.54      | 7.56       | 3.58     | 0.26      | 0.77      | 6.91      | 1.36             | 1.60         |
| 25          | 1970 | 93.14            | 6.69      | 2.94       | 1.70     | 8.75      | 3.18      | 5.63      | 1.02             | 0.30         |
| 27          | 1962 | 92.37            | 7.25      | 2.55       | 1.64     | 5.50      | 2.17      | 5.95      | 0.89             | 0.42         |
| 29          | 1954 | 89.90            | 8.63      | 2.58       | 0.64     | 4.19      | 1.72      | 4.51      | 0.62             | 0.33         |
| 32          |      | 89.28            |           | 2.60       | 0.78     | 0.33      | 0.78      | 5.39      | 0.62             | 0.18         |

## LD1

| Depth<br>cm | Age  | Porosity<br>vol% | Al<br>Wt% | TOC<br>Wt% | S<br>Wt% | Mn<br>Wt% | Ca<br>Wt% | Fe<br>Wt% | Fe/Al<br>wt%/wt% | Mo<br>μmol/g |
|-------------|------|------------------|-----------|------------|----------|-----------|-----------|-----------|------------------|--------------|
| 0.25        | 2011 | 98.89            | 4.76      | 7.86       | 1.96     | 7.97      | 1.85      | 3.78      | 0.80             | 0.65         |
| 0.75        | 2010 | 98.83            | 3.30      | 4.74       | 1.88     | 21.35     | 3.13      | 2.79      | 0.84             | 0.80         |
| 1.25        | 2010 | 98.45            | 2.89      | 4.34       | 1.67     | 23.78     | 3.50      | 2.32      | 0.80             | 1.23         |
| 1.75        | 2010 | 98.06            | 4.12      | 4.42       | 1.28     | 16.77     | 3.04      | 3.04      | 0.74             | 0.98         |
| 2.5         | 2010 | 97.75            | 3.86      | 3.80       | 1.49     | 17.06     | 2.49      | 2.51      | 0.65             | 0.58         |
| 3.5         | 2010 | 97.94            | 3.97      | 3.51       | 1.34     | 20.23     | 2.88      | 2.55      | 0.64             | 0.59         |
| 4.5         | 2009 | 98.42            | 2.69      | 4.00       | 1.42     | 24.56     | 3.79      | 1.99      | 0.74             | 1.18         |
| 5.5         | 2009 | 98.52            | 3.21      | 4.26       | 1.64     | 14.63     | 1.91      | 1.97      | 0.61             | 0.59         |
| 6.5         | 2008 | 98.26            | 3.19      | 3.84       | 1.18     | 20.61     | 3.28      | 2.23      | 0.70             | 0.71         |
| 7.5         | 2008 | 97.94            | 2.80      | 3.82       | 1.02     | 23.88     | 3.59      | 1.78      | 0.64             | 0.65         |

|     |      |       |      |      |      |       |      |      |      |      |
|-----|------|-------|------|------|------|-------|------|------|------|------|
| 8.5 | 2008 | 97.69 | 3.34 | 4.77 | 1.61 | 20.65 | 3.08 | 2.65 | 0.79 | 1.31 |
| 9.5 | 2007 | 97.24 | 2.99 | 5.01 | 1.99 | 21.61 | 3.32 | 2.57 | 0.86 | 1.06 |
| 11  | 2006 | 97.00 | 1.83 | 3.58 | 1.66 | 25.77 | 3.77 | 1.39 | 0.76 | 1.00 |
| 13  | 2005 | 97.24 | 4.79 | 7.52 | 2.00 | 6.15  | 1.39 | 3.78 | 0.79 | 1.08 |
| 15  | 2002 | 97.28 | 3.55 | 5.53 | 2.33 | 16.89 | 2.51 | 3.28 | 0.92 | 1.20 |
| 17  | 2000 | 94.67 | 2.44 | 4.56 | 2.12 | 25.67 | 3.56 | 2.03 | 0.83 | 1.21 |
| 19  | 1997 | 94.74 | 3.76 | 6.93 | 2.52 | 11.58 | 2.16 | 3.84 | 1.02 | 0.99 |
| 21  | 1992 | 94.65 | 3.47 | 6.14 | 3.82 | 14.18 | 2.10 | 4.58 | 1.32 | 1.07 |
| 23  | 1986 | 94.83 | 2.61 | 3.67 | 2.39 | 19.44 | 3.43 | 4.39 | 1.68 | 0.16 |
| 25  | 1980 | 94.80 | 3.47 | 3.13 | 2.39 | 16.62 | 2.78 | 4.83 | 1.39 | 1.03 |
| 27  | 1974 | 93.31 | 6.36 | 2.82 | 1.49 | 7.52  | 1.99 | 5.04 | 0.79 | 0.64 |
| 29  | 1965 | 93.44 | 7.80 | 2.68 | 1.25 | 1.28  | 1.00 | 5.87 | 0.75 | 0.08 |
| 32  | 1955 | 92.35 | 8.03 | 2.29 | 0.81 | 0.64  | 0.90 | 5.67 | 0.71 | 0.03 |
| 36  | 1937 | 95.37 | 8.11 | 2.07 | 0.75 | 0.40  | 0.88 | 5.37 | 0.66 | 0.00 |

---
