# Supplementary material for: Are recent changes in sediment manganese sequestration in the euxinic basins of the Baltic Sea linked to the expansion of hypoxia?
Source: Copernicus journal article supplement (doi:10.5194/bg-12-4875-2015), 2015-08-19
Supplement: Supplementary file 3 [file bg-12-4875-2015-supplement.zip]

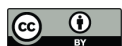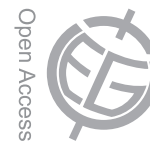

## *Supplement of*

# **Are recent changes in sediment manganese sequestration in the euxinic basins of the Baltic Sea linked to the expansion of hypoxia?**

**C. Lenz et al.**

*Correspondence to:* C. Lenz (conny.lenz@geol.lu.se)

- [bg-12-4875-2015-supplement-title-page.pdf](#)
- [Supplement1.pdf](#)
- [Supplement2.pdf](#)
- [Supplement3.pdf](#)

The copyright of individual parts of the supplement might differ from the CC-BY 3.0 licence.
